# Supplementary material
Source: PubMed Central journal article supplement (PMC4918386)
Supplement: ncomms9000-s1.pdf [file ncomms9000-s1.pdf]

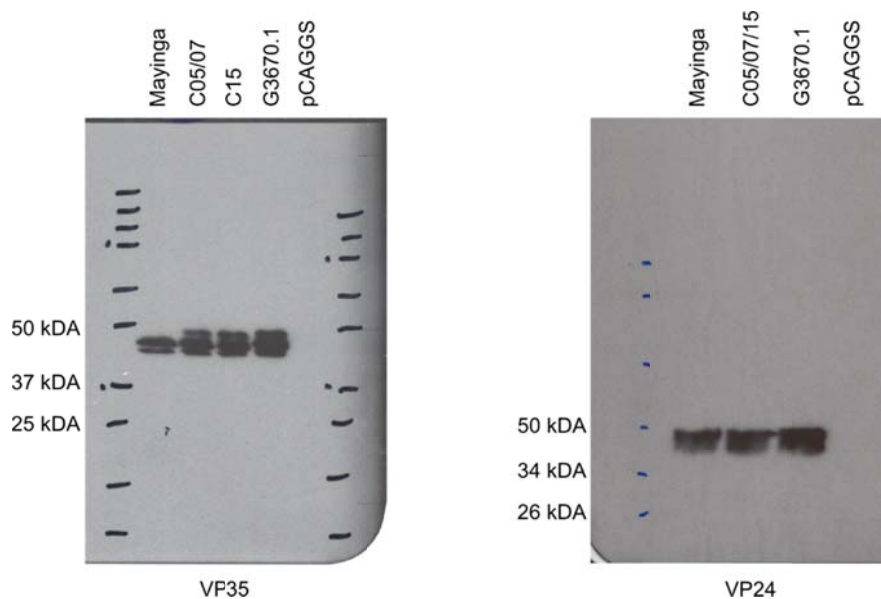

**Supplementary Figure 1: Full Western blots of VP35 and VP24 expression.** Full blots, portions of which are presented in Figure 1C, are shown.

### Supplementary Methods

**Cloning of VP35 and VP24 variants for Mayinga, C05, and C15 isolates:** All VP35 variants were inserted into the pCAGGS vector using the restriction enzymes NotI and SacI. All VP24 variants were inserted with the enzymes XhoI and BglII. Inserts were cloned either from plasmids (Mayinga sequences) or cDNA (C05 and C15 sequences). PCR was carried out using iProof Polymerase (BioRad) according to manufacturer's instructions. Primers used were as follows:

VP35\_C05\_C15\_May\_NotI\_fwd: GACTCAGCGGCCGCATGACAACACTAGAACAAAGGGCAGG

VP35\_C05\_C15\_May\_SacI\_rev: GTCCAGGTCGAGCTCGTCAAATTTTGAGTCCAAGTGTTTTACCATC

VP24\_C05\_XhoI\_fwd: CATGATCTCGAGATGGCCAAAGCTACGGGACG

VP24\_May\_XhoI\_fwd: CATGATCTCGAGATGGCTAAAGCTACGGGACG

VP24\_C05\_BglII\_rev: AGCACGAGATCTGTTAGATAGCAAGAGAGCTATTGAATTC

VP24\_May\_BglII\_rev: AGCACGAGATCTGTTAGATAGCAAGAGAGCTATTAAATTC

**Cloning of G3670.1 sequences for VP35, VP24:** To create plasmids encoding for VP35 and VP24 from the Sierra Leone G3670.1 sequence, the plasmids encoding the C05 sequences for each of these proteins were used for site-directed mutagenesis using the following primers:

VP35-T3388G-fwd: CCAATGAAGCCAATGTTTGTCTACCTCCTCAAACTATGA

VP35-T3388G-rev: TCATAGTTTTGAGGAGGTAGGACAAACATTGGCTTCATTGG

To achieve the single amino acid change differentiating the G3670.1 sequence from that of C05, the gene was amplified in two parts using VP24\_C05\_XhoI\_fwd and VP24-A10801G-rev (CCGTGCATGCGTCTCTAACCAACGACAGCATTTTTAGGCTC), and VP24\_C05\_BglII\_rev and ED16\_VP24-A10801G-fwd (CATGGCATGCGTCTCAGGTTTCGATCCAATATTCTCAAGTTTATTAAC), which were joined after BsmBI digest, and cloned into pCAGGS via XhoI and BglII.

**Primers used for creation of RIG-I CARD domain plasmid:** The coding region between amino acids 200 and 925 was deleted from a RIG-I plasmid using the Quick Change Lightning site-directed mutagenesis kit (Agilent) according to manufacturer's instructions. The following primers were used: CTCCTTCAATGGATCCTAAGATCTTCTGTTTCAACATCTTTTATACCTT, AAGGTATAAAAGATGTTGAAACAGAAGATCTTAGGATCCATTGAAGGAAG.
